# Supplementary material for: Robust and rigorous identification of tissue-specific genes by statistically extending tau score
Source: BioData Min. 2022 Dec 9;15:31. doi: 10.1186/s13040-022-00315-9 (PMC9733102; doi:10.1186/s13040-022-00315-9)
Supplement: Supplementary file 8 — Additional file 8. Descriptive summary of all datasets. [file 13040_2022_315_MOESM8_ESM.xlsx]

## Sheet: Sheet1
Data	Number of tissue	Number of samples	Sex	Developmental stage	Experiment type Platform/Model	Data type	Expression level	Raw Data Provider
E-MTAB-2836	32	122 individuals	Male and female	Adult	Illumina HiSeq 2000 paired end sequencing	HPA, RNA-seq	FPKM	Uhlen Lab (https://www proteinatlas org/humanproteome/tissue+specific)
E-MTAB-1733	27	95 individuals	Male and female	Adult	Illumina HiSeq 2000 paired end sequencing	HPA,	FPKM	Fagerberg et al. 2014
E-MTAB-5214	53	1641 samples	Male and female	Adult	Illumina HiSeq 2000 paired end sequencing	RNA-seq	FPKM	GTEx Project (https://www gtexportal org/home/)
E-MTAB-3358	56	-	Male and female	Adult	HELICOS, Helicos HeliScope	RNA-Seq, CAGE	TPM	FANTOM5 Project (http://fantom gsc riken jp/data/)
E-MTAB-4344	13	348 samples	Male and female	Adult	Different platforms	RNA-seq	FPKM	ENCODE Project (https://www encodeproject org/)
