# Supplementary material for: Robust and rigorous identification of tissue-specific genes by statistically extending tau score
Source: BioData Min. 2022 Dec 9;15:31. doi: 10.1186/s13040-022-00315-9 (PMC9733102; doi:10.1186/s13040-022-00315-9)
Supplement: Supplementary file 9 — Additional file 9. Number of genes and tissues in each dataset. [file 13040_2022_315_MOESM9_ESM.xlsx]

## Sheet: Sheet1
# number of	E-MTAB-1733	E-MTAB-2836	E-MTAB-5214	E-MTAB-3358	E-MTAB-4344
all tissues	27	32	53	56	13
all genes	20050	57073	57073	21017	57073
filtered tissues*	27	32	48	56	13
filtered genes**	18863	19676	19676	16438	19676
* Cell types were filtered, number of tissues/organs was only used for analysis.
**Genes were filtered according to whether it is protein-coding or not.
