# Supplementary material for: Robust and rigorous identification of tissue-specific genes by statistically extending tau score
Source: BioData Min. 2022 Dec 9;15:31. doi: 10.1186/s13040-022-00315-9 (PMC9733102; doi:10.1186/s13040-022-00315-9)
Supplement: Supplementary file 10 — Additional file 10. Optimized thresholds and Z-scores for each dataset. [file 13040_2022_315_MOESM10_ESM.xlsx]

## Sheet: Sheet1
# values	EMTAB-1733	EMTAB-2836	EMTAB-5214	EMTAB-3358	EMTAB-4344
optimized threshold	0.1	0.16	0.16	0.43	0.15
Z-value	2.46	2.72	2.73	3.54	2.68
