# Supplementary material for: Robust and rigorous identification of tissue-specific genes by statistically extending tau score
Source: BioData Min. 2022 Dec 9;15:31. doi: 10.1186/s13040-022-00315-9 (PMC9733102; doi:10.1186/s13040-022-00315-9)
Supplement: Supplementary file 11 — Additional file 11. Determining parent-child tissue relationship. [file 13040_2022_315_MOESM11_ESM.xlsx]

## Sheet: Sheet1
Parent BTO ID	Parent Tissue	Child BTO ID	Child Tissue
BTO_0001487	adipose tissue	BTO_0001487	adipose tissue
BTO_0001487	adipose tissue	BTO_0004042	subcutaneous adipose tissue
BTO_0001487	adipose tissue		greater omentum
BTO_0000047	adrenal gland	BTO_0000047	adrenal gland
BTO_0000084	appendix	BTO_0000084	appendix
BTO_0000123	bladder	BTO_0000493	gall bladder
BTO_0000123	bladder	BTO_0001418	urinary bladder
BTO_0000141	bone marrow	BTO_0000141	bone marrow
BTO_0000142	brain	BTO_0000142	brain
BTO_0000142	brain	BTO_0001042	amygdala
BTO_0000142	brain	BTO_0000211	caudate nucleus
BTO_0000142	brain	BTO_0000231	cerebellar hemisphere
BTO_0000142	brain	BTO_0000232	cerebellum
BTO_0000142	brain	BTO_0000233	cerebral cortex
BTO_0000142	brain	BTO_0000342	diencephalon
BTO_0000142	brain	BTO_0001637	dura mater
BTO_0000142	brain	BTO_0002246	globus pallidus
BTO_0000142	brain	BTO_0000601	hippocampus
BTO_0000142	brain	BTO_0000614	hypothalamus
BTO_0000142	brain	BTO_0001408	locus ceruleus
BTO_0000142	brain	BTO_0000041	medulla oblongata
BTO_0000142	brain	BTO_0000144	brain meninx
BTO_0000142	brain	BTO_0004834	middle frontal gyrus
BTO_0000142	brain		middle temporal gyrus
BTO_0000142	brain	BTO_0001862	nucleus accumbens
BTO_0000142	brain		occipital cortex
BTO_0000142	brain	BTO_0000293	occipital lobe
BTO_0000142	brain	BTO_0001001	parietal lobe
BTO_0000142	brain	BTO_0001067	pineal gland
BTO_0000142	brain	BTO_0000427	pituitary gland
BTO_0000142	brain	BTO_0000212	putamen
BTO_0000142	brain	BTO_0000143	substantia nigra
BTO_0000142	brain	BTO_0001365	thalamus
BTO_0000142	brain		tibial nerve
BTO_0000142	brain	BTO_0001362	olfactory apparatus
BTO_0000149	breast	BTO_0000149	breast
BTO_0000269	colon	BTO_0000269	colon
BTO_0000269	colon	BTO_0000645	sigmoid colon
BTO_0000269	colon	BTO_0000272	transverse colon
BTO_0000408	epididymis	BTO_0000408	epididymis
BTO_0000959	esophagus	BTO_0000959	esophagus
BTO_0000959	esophagus		esophagus muscularis mucosa
BTO_0000959	esophagus	BTO_0004364	gastroesophageal junction
BTO_0000959	esophagus	BTO_0002859	esophagus mucosa
BTO_0000562	heart	BTO_0000562	heart
BTO_0000562	heart	BTO_0000903	atrium
BTO_0000562	heart	BTO_0001702	left atrium
BTO_0000562	heart	BTO_0001629	left ventricle
BTO_0000671	kidney	BTO_0000671	kidney
BTO_0000671	kidney	BTO_0001166	cortex of kidney
BTO_0000759	liver	BTO_0000759	liver
BTO_0000763	lung	BTO_0000763	lung
BTO_0000784	lymph node	BTO_0000784	lymph node
BTO_0000784	lymph node	BTO_0001387	tonsil
BTO_0000887	muscle	BTO_0001260	smooth muscle
BTO_0000887	muscle	BTO_0001103	skeletal muscle
BTO_0000975	ovary	BTO_0000975	ovary
BTO_0000980	oviduct	BTO_0000980	oviduct
BTO_0000988	pancreas	BTO_0000988	pancreas
BTO_0000405	penis	BTO_0000405	penis
BTO_0001078	placenta	BTO_0001078	placenta
BTO_0001129	prostate	BTO_0001129	prostate
BTO_0001158	rectum	BTO_0001158	rectum
BTO_0001203	salivary gland	BTO_0001203	salivary gland
BTO_0001203	salivary gland		minor salivary gland
BTO_0001203	salivary gland	BTO_0001004	parotid gland
BTO_0001203	salivary gland	BTO_0001316	submandibular gland
BTO_0001234	seminal vesicle	BTO_0001234	seminal vesicle
BTO_0001253	skin	BTO_0001253	skin
BTO_0001253	skin		lower leg skin
BTO_0001253	skin		suprapubic skin
BTO_0001253	skin		zone of skin
BTO_0000651	small intestine	BTO_0000651	small intestine
BTO_0000651	small intestine	BTO_0000365	duodenum
BTO_0000651	small intestine	BTO_0001784	small intestine Peyers patch
BTO_0001281	spleen	BTO_0001281	spleen
BTO_0001279	spinal cord	BTO_0001279	spinal cord
BTO_0001307	stomach	BTO_0001307	stomach
BTO_0001363	testis	BTO_0001363	testis
BTO_0001379	thyroid	BTO_0001379	thyroid
BTO_0001385	tongue	BTO_0001385	tongue
BTO_0001424	uterus	BTO_0001424	uterus
BTO_0001424	uterus	BTO_0001422	endometrium
BTO_0001424	uterus	BTO_0001421	cervix
BTO_0001424	uterus		ectocervix
BTO_0001424	uterus	BTO_0003002	endocervix
BTO_0000243	vagina	BTO_0000243	vagina
BTO_0000564	valve		mitral valve
BTO_0000564	valve		pulmonary valve
BTO_0000564	valve		tricuspid valve
BTO_0001427	vas deferens	BTO_0001427	vas deferens
BTO_0001102	vessel	BTO_0000573	artery
BTO_0001102	vessel	BTO_0000290	coronary artery
BTO_0001102	vessel	BTO_0000135	aorta
BTO_0001102	vessel		tibial artery
BTO_0000089	whole blood	BTO_0000089	whole blood
