# Supplementary material for: Robust and rigorous identification of tissue-specific genes by statistically extending tau score
Source: BioData Min. 2022 Dec 9;15:31. doi: 10.1186/s13040-022-00315-9 (PMC9733102; doi:10.1186/s13040-022-00315-9)
Supplement: Supplementary file 12 — Additional file 12. F-test results for each pair of datasets. [file 13040_2022_315_MOESM12_ESM.xlsx]

## Sheet: Sheet1
F statistics	P value	Data 1	Data 2
1	1	data1733	data1733
0.958877	7.64e-56	data1733	data2836
0.438192	0	data1733	data5214
0.301555	0	data1733	data4344
0.131452	0	data1733	data3358
1.04289	0	data2836	data1733
1	1	data2836	data2836
0.456985	0	data2836	data5214
0.314488	0	data2836	data4344
0.13709	0	data2836	data3358
2.2821	0	data5214	data1733
2.18826	0	data5214	data2836
1	1	data5214	data5214
0.68818	0	data5214	data4344
0.299987	0	data5214	data3358
3.31614	0	data4344	data1733
3.17978	0	data4344	data2836
1.45311	0	data4344	data5214
1	1	data4344	data4344
0.435914	0	data4344	data3358
7.60734	0	data3358	data1733
7.2945	0	data3358	data2836
3.33347	0	data3358	data5214
2.29403	0	data3358	data4344
1	1	data3358	data3358
