# Supplementary material for: Robust and rigorous identification of tissue-specific genes by statistically extending tau score
Source: BioData Min. 2022 Dec 9;15:31. doi: 10.1186/s13040-022-00315-9 (PMC9733102; doi:10.1186/s13040-022-00315-9)
Supplement: Supplementary file 13 — Additional file 13. Number of tissue specific genes for each tissue. [file 13040_2022_315_MOESM13_ESM.xlsx]

## Sheet: Sheet1
Tissues	Number of specific genes	Tissues	Number of specific genes
adipose tissue	203	mitral valve	52
adrenal gland	312	nucleus accumbens	113
amygdala	91	occipital cortex	18
aorta	25	occipital lobe	30
appendix	263	olfactory apparatus	23
artery	135	ovary	216
atrium	67	oviduct	157
bone marrow	329	pancreas	407
brain	916	parietal lobe	20
brain meninx	29	parotid gland	75
breast	42	penis	47
caudate nucleus	150	pineal gland	99
cerebellar hemisphere	243	pituitary gland	161
cerebellum	334	placenta	332
cerebral cortex	645	prostate	165
cervix	39	pulmonary valve	61
colon	273	putamen	136
coronary artery	10	rectum	77
cortex of kidney	72	salivary gland	139
diencephalon	28	seminal vesicle	53
duodenum	310	sigmoid colon	101
dura mater	53	skeletal muscle	332
ectocervix	14	skin	366
endocervix	15	small intestine	598
endometrium	67	small intestine Peyers patch	135
epididymis	108	smooth muscle	47
esophagus	248	spinal cord	16
esophagus mucosa	171	spleen	700
esophagus muscularis mucosa	6	stomach	210
gall bladder	145	subcutaneous adipose tissue	17
gastroesophageal junction	6	submandibular gland	75
globus pallidus	13	substantia nigra	159
greater omentum	22	suprapubic skin	178
heart	473	testis	3770
hippocampus	100	thalamus	15
hypothalamus	82	thyroid	158
kidney	612	tibial artery	15
left atrium	63	tibial nerve	51
left ventricle	133	tongue	177
liver	1057	tonsil	95
locus ceruleus	23	transverse colon	105
lower leg skin	190	tricuspid valve	38
lung	451	urinary bladder	65
lymph node	235	uterus	34
medulla oblongata	59	vagina	89
middle frontal gyrus	23	vas deferens	50
middle temporal gyrus	25	whole blood	245
minor salivary gland	71	zone of skin	183
